# Supplementary material for: The confinement of SnO2nanocrystals into 3D RGO architectures for improved rate and cyclic performance of LIB anode
Source: Royal Society of Chemistry journal article supplement (doi:10.1039/c6ce00362a), 2016-01-01
Supplement: c6ce00362a1.pdf [file c6ce00362a1.pdf]

## Electronic Supplementary Information

### *Three-dimensional reduced graphene oxide-SnO<sub>2</sub> architecture as anode for high-performance lithium ion batteries*

*Sul Ki Park,<sup>a</sup> Hyun-Kyung Kim,<sup>b,c</sup> Kwang Chul Roh,<sup>d</sup> Kwang-Bum Kim\*,<sup>b</sup> and Ho Seok Park\*<sup>a</sup>*

#### SEM-EDAX

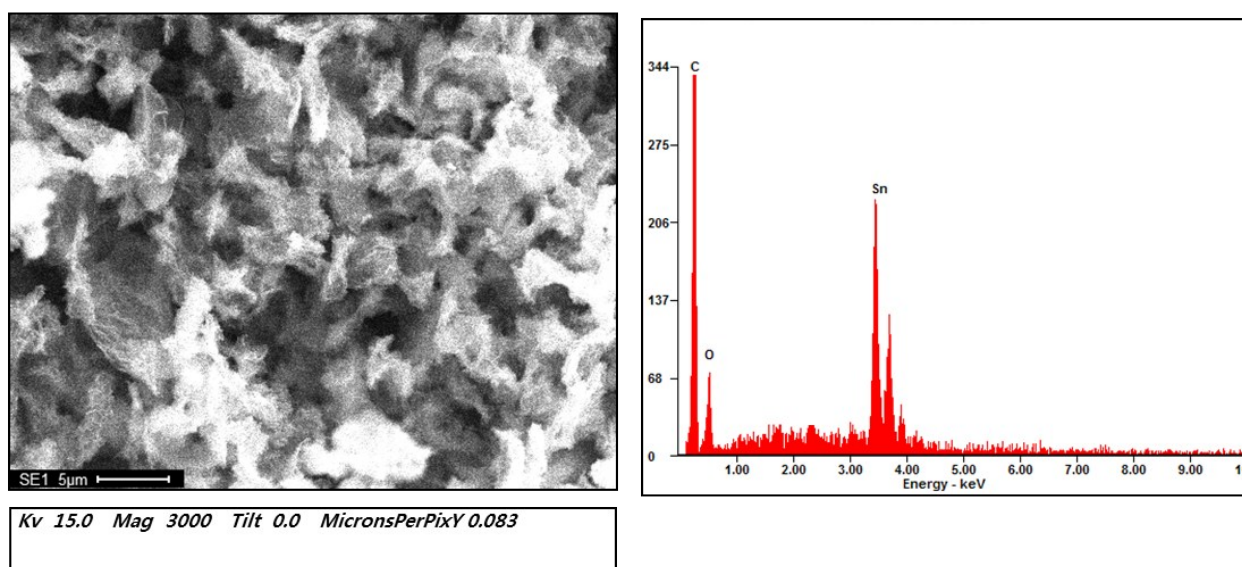

**Figure S1.** SEM images and EDS data of the 3D RGO-SnO<sub>2</sub> architecture.

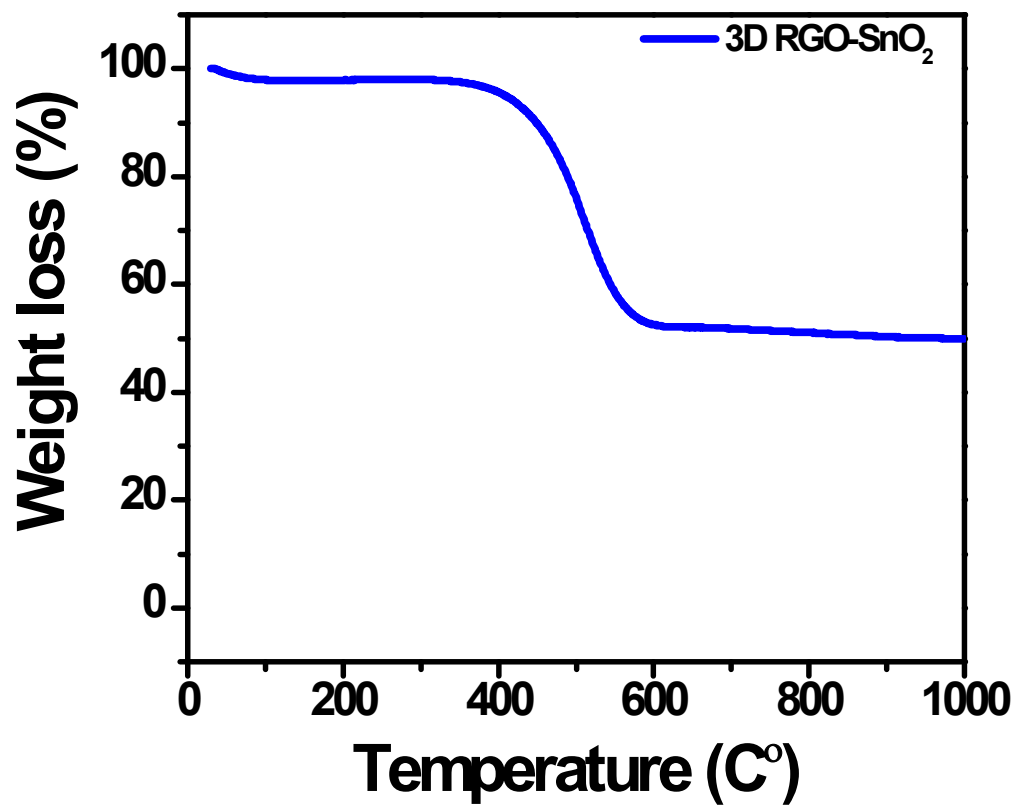

Figure S2. TGA data for 50 wt.% SnO<sub>2</sub> in the 3D-RGO-SnO<sub>2</sub> architecture.

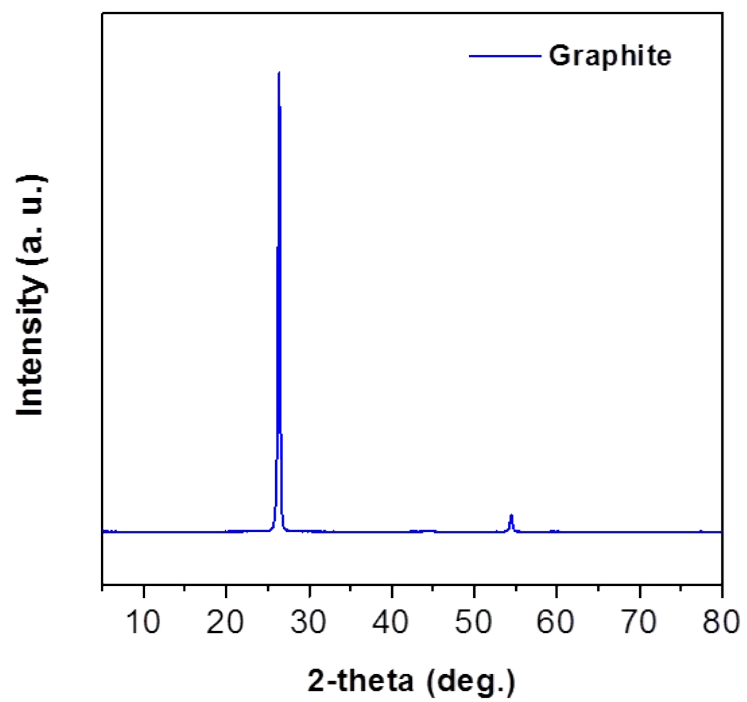

**Figure S3.** XRD patterns of graphite.

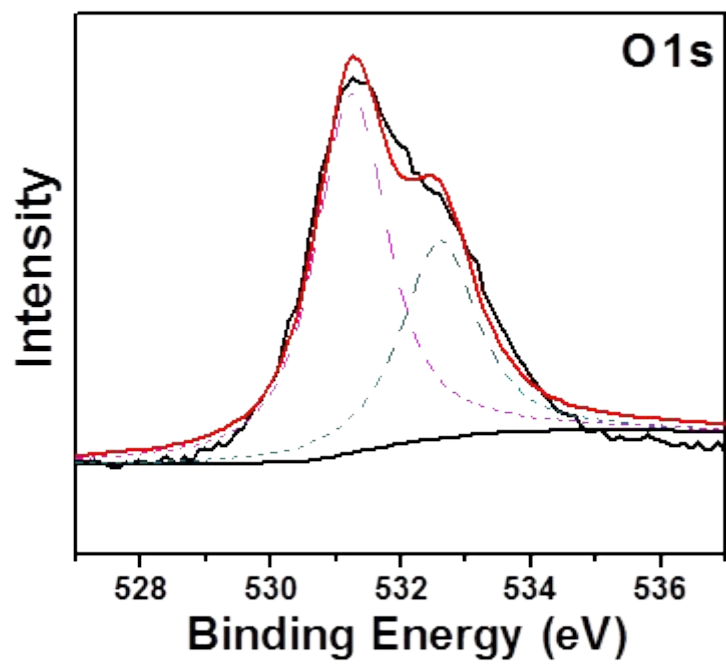

**Figure S4.** XPS O 1s spectrum of the 3D RGO-SnO<sub>2</sub> architecture.

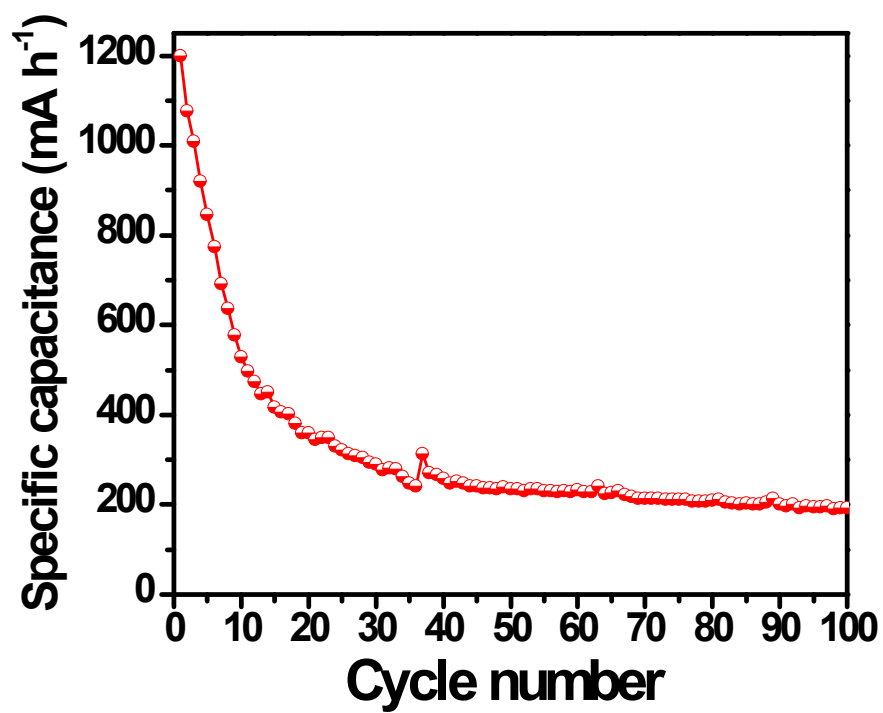

**Figure S5.** Cyclability of the 2D RGO-SnO<sub>2</sub> architecture.
